# Supplementary material
Source: PubMed Central journal article supplement (PMC6322384)
Supplement: EMBR-20-e46588-s001.pdf [file EMBR-20-e46588-s001.pdf]

## **Appendix of the manuscript entitled:**

### **The key protein of endosomal mRNP transport Rrm4 binds translational landmark sites of cargo mRNAs**

**Lilli Olgeiser<sup>1</sup>, Carl Haag<sup>1</sup>, Susan Boerner<sup>2</sup>, Jernej Ule<sup>3,4</sup>, Anke Busch<sup>5</sup>, Janine Koepke<sup>6</sup>,  
Julian König<sup>5</sup>, Michael Feldbrügge<sup>1, \$</sup> and Kathi Zarnack<sup>2, \$</sup>**

**\$ shared corresponding authorship**

<sup>1</sup> Heinrich Heine University Düsseldorf, Institute for Microbiology, Cluster of Excellence on Plant Sciences, 40204 Düsseldorf, Germany

<sup>2</sup> Buchmann Institute for Molecular Life Sciences (BMLS), Goethe University Frankfurt, Max-von-Laue-Str. 15, 60438 Frankfurt am Main, Germany

<sup>3</sup> The Francis Crick Institute, Midland Road 1, Kings Cross, London NW1 1AT, UK

<sup>4</sup> Department of Molecular Neuroscience, UCL Institute of Neurology, Queen Square, London, WC1N3BG, UK

<sup>5</sup> Institute of Molecular Biology gGmbH, Ackermannweg 4, 55128 Mainz, Germany

<sup>6</sup> Medical Clinic II (Molecular Pneumology), Justus Liebig University of Gießen, Excellence Cluster Cardio-Pulmonary System, Aulweg 130, 35392 Gießen, Germany

#### **Table of content:**

|                         |    |
|-------------------------|----|
| Appendix Table S1.....  | 02 |
| Appendix Table S2.....  | 03 |
| Appendix Table S3.....  | 04 |
| Appendix Table S4 ..... | 05 |

**Appendix Table S1: *U. maydis* strains used in this study.**  
eGfp, enhanced Gfp. UMa, internal reference number.

| Strain                  | Relevant genotype          | Short description                                                                                                                                                 | Reference              | UMa  |
|-------------------------|----------------------------|-------------------------------------------------------------------------------------------------------------------------------------------------------------------|------------------------|------|
| AB33                    | <i>a2 Pnar:bW2bE1</i>      | expression of active b heterodimer under control of the P <sub>nar1</sub> promoter; strain grows filamentously upon changing the nitrogen source                  | Brachmann et al., 2001 | 133  |
| AB33rrm4Δ               | <i>rrm4Δ</i>               | carries a deletion of <i>rrm4</i>                                                                                                                                 | Becht et al., 2006     | 273  |
| AB33rrm4G               | <i>rrm4G</i>               | expresses Rrm4 C-terminally fused to eGFP                                                                                                                         | Becht et al., 2006     | 274  |
| AB33pab1G               | <i>pab1G</i>               | expresses Pab1 C-terminally fused to eGfp                                                                                                                         | König et al., 2009     | 389  |
| AB33grp1Δ               | <i>grp1Δ</i>               | carries a deletion of <i>grp1</i>                                                                                                                                 | This study             | 380  |
| AB33grp1G               | <i>grp1G</i>               | expresses Grp1 C-terminally fused to eGfp                                                                                                                         | This study             | 911  |
| AB33rrm4tR/grp1G        | <i>grp1G/rrm4Δ</i>         | co-expresses Rrm4 C-terminally fused to tagRfp and Grp1 C-terminally fused to eGfp                                                                                | This study             | 2169 |
| AB33pab1mC/grp1G        | <i>pab1mC/grp1G</i>        | co-expresses Pab1 C-terminally fused to mCherry and Grp1 C-terminally fused to eGfp                                                                               | This study             | 2200 |
| AB33pab1mC/rrm4G        | <i>pab1mC/rrm4G</i>        | co-expresses Pab1 C-terminally fused to mCherry and Rrm4 C-terminally fused to eGfp                                                                               | König et al., 2009     | 554  |
| AB33rrm4G/grp1Δ         | <i>rrm4G/grp1Δ</i>         | expresses Rrm4 C-terminally fused to eGfp and carries a <i>grp1</i> deletion                                                                                      | This study             | 880  |
| AB33grp1G/rrm4Δ         | <i>grp1G/rrm4Δ</i>         | expresses Grp1 C-terminally fused to eGfp and carries a <i>rrm4</i> deletion                                                                                      | This study             | 1050 |
| AB33pab1G/rrm4Δ         | <i>pab1G/rrm4Δ</i>         | expresses Pab1 C-terminally fused to eGfp and carries a <i>rrm4</i> deletion                                                                                      | König et al., 2009     | 472  |
| AB33gfp                 | <i>gfp</i>                 | expresses <i>gfp</i> under control of the constitutive P <sub>ter</sub> -promotor. The <i>gfp</i> construct is integrated ectopically into the <i>ipS</i> -locus. | Koepke et al., 2011    | 487  |
| AB33rrm4mR123tR/grp1G   | <i>grp1G/rrm4Δ</i>         | co-expresses Rrm4 <sup>mR123</sup> C-terminally fused to tagRfp and Grp1 C-terminally fused to eGfp                                                               | This study             | 2012 |
| AB33rrm4mR123tR/pab1G   | <i>pab1G/rrm4Δ</i>         | co-expresses Rrm4 <sup>mR123</sup> C-terminally fused to tagRfp and Pab1 C-terminally fused to eGfp                                                               | This study             | 1200 |
| AB33 rrm4G/pab1mC/grp1Δ | <i>rrm4GT/pab1mC/grp1Δ</i> | co-expresses Rrm4 C-terminally fused to eGfp-tandem affinity purification tag and Pab1 C-terminally fused to mCherry, while carrying a <i>grp1</i> deletion       | This study             | 2156 |

**Appendix Table S2: *U. maydis* strains generated in this study.**

UMa and pUMa, internal reference numbers for strains and plasmids, respectively.

| Strain                  | UMa  | Relevant genotype         | Transformed plasmid           | Locus       | Progenitor strain |
|-------------------------|------|---------------------------|-------------------------------|-------------|-------------------|
| AB33grp1Δ               | 380  | <i>grp1Δ</i>              | pGrp1Δ-HygR (pUMa 848)        | <i>grp1</i> | AB33              |
| AB33grp1G               | 911  | <i>grp1G</i>              | pGrp1G-NatR (pUMa 1595)       | <i>grp1</i> | AB33              |
| AB33rrm4tR/grp1G        | 2169 | <i>rrm4tR/grp1G</i>       | pRrm4tR_G418R (pUMa 3004)     | <i>rrm4</i> | AB33grp1G/rrm4Δ   |
| AB33pab1mC/grp1G        | 2200 | <i>pab1mC/grp1G</i>       | pPab1mC_HygR (pUMa1208)       | <i>pab1</i> | AB33grp1G         |
| AB33rrm4G/grp1Δ         | 880  | <i>rrm4G/grp1Δ</i>        | pGrp1Δ-HygR (pUMa848)         | <i>grp1</i> | AB33rrm4G         |
| AB33grp1G/rrm4Δ         | 1050 | <i>grp1G/rrm4Δ</i>        | pRrm4Δ-HygR (pUMa1391)        | <i>rrm4</i> | AB33grp1G         |
| AB33rrm4mR123tR/grp1G   | 2012 | <i>rrm4mR123tR/grp1G</i>  | pRrm4mR123tR_G418R (pUMa2849) | <i>rrm4</i> | AB33grp1G/rrm4Δ   |
| AB33rrm4mR123tR/pab1G   | 1200 | <i>rrm4mR123tR/pab1G</i>  | pRrm4mR123tR_G418R (pUMa2849) | <i>rrm4</i> | AB33pab1G         |
| AB33 rrm4G/pab1mC/grp1Δ | 2156 | <i>rrm4G/grp1Δ/pab1mC</i> | pPab1mC-G418R (pUMa3052)      | <i>pab1</i> | AB33 rrm4G/grp1Δ  |

**Appendix Table S3: Plasmids generated in this study for *U. maydis*.**

pUMa, internal plasmid reference number.

| Plasmid            | pUMa      | Resistance cassette              | Short description                                                                                                                                                                                                                                                                                                                                                                                                                                                                                                                                                |
|--------------------|-----------|----------------------------------|------------------------------------------------------------------------------------------------------------------------------------------------------------------------------------------------------------------------------------------------------------------------------------------------------------------------------------------------------------------------------------------------------------------------------------------------------------------------------------------------------------------------------------------------------------------|
| pGrp1Δ-HygR        | pUMa 848  | HygR<br>(SfiI-insert of MF1hs)   | Plasmid for generating deletion mutants of <i>grp1</i> . The hygromycin resistance cassette is flanked by the regions 0.9 kb upstream and 0.8 kb downstream of <i>grp1</i> . The flanking regions were amplified by PCR (UF: oSL217 ATGGTCTCGACTTGCGCG, oSL218 ttcggccatctaggccACGTAAACTTTGGCGGCC), (DF: oSL219, oSL220) using UM521 wild type DNA.                                                                                                                                                                                                              |
| pGrp1G-NatR        | pUMa 1595 | NatR<br>(SfiI-insert of pMF5-1n) | Plasmid for generating eGfp-fusions of <i>grp1</i> . The eGfp cassette, containing the T <sub>nos</sub> terminator and the nourseothricin resistance cassette is flanked by a 2.3 kb upstream region, containing the entire <i>grp1</i> ORF, and a 0.8 kb downstream region. Both regions were amplified by PCR using genomic UM521 wild type DNA as template (UF: oSL865 GTCATTTAAATGGTCTCGACTTGCGCG, oSL863 CCATGGTGGCCGCTTGGCCGCCTGGCTCTGTCCGTTGTATC; 2.3 kb); DF (oSL864 TGAGGCCTGAGTGGCCACGACTCTTGTCTCGGGGC, oSL866 GCTATTTAAATGTAGCGTTGCCACTCAGC; 0.8 kb). |
| pRrm4tR_G418R      | pUMa 3004 | G418R<br>(SfiI-insert of pMF1-g) | Plasmid for generating tagRfp-3x myc tag fusions of tagRfp of <i>rrm4</i> . The tagRfp cassette contains the T <sub>nos</sub> terminator and a G418 resistance cassette. It is flanked by a 3.2 kb upstream region, containing the entire 2.4 kb <i>rrm4</i> ORF, and the 2 kb immediately downstream of <i>rrm4</i> . The plasmid is a derivate of pRrm4G-NatR (Becht et al., 2006), with eGfp being exchanged for tagRfp.                                                                                                                                      |
| pRrm4mR123tR_G418R | pUMa2849  |                                  | Plasmid for generating tagRfp-3x myc tag fusions of <i>rrm4</i> <sup>mR123</sup> . pRrm4tR_G418R, but carrying mutations in the RNP1 region of each RRM.                                                                                                                                                                                                                                                                                                                                                                                                         |
| pPab1mK-G418R      | pUMa3052  |                                  | Plasmid for generating mKate <sub>2</sub> -HA tag fusions of <i>pab1</i> . The mKate <sub>2</sub> cassette contains the T <sub>nos</sub> terminator and a G418 resistance cassette. The cassette is flanked by a 3 kb upstream region, containing the 2 kb <i>pab1</i> ORF, and the 1 kb downstream of <i>pab1</i> . The plasmid is a derivate of pPab1G-NatR (König et al., 2009).                                                                                                                                                                              |

**Appendix Table S4: Plasmids used for yeast three-hybrid system.**

pUMa, internal plasmid reference number.

| Plasmid                   | pUMa | Gene        | Short description                                                                                                                                                                                                                                                                                                                                                                   |
|---------------------------|------|-------------|-------------------------------------------------------------------------------------------------------------------------------------------------------------------------------------------------------------------------------------------------------------------------------------------------------------------------------------------------------------------------------------|
| pACTII-Ade                | 399  |             | Plasmid for the expression of hybrid proteins. Contains a Gal4 activation domain, to which sequences of interest can be fused. For positive selection this plasmid carries the <i>LEU2</i> and <i>ADE2</i> auxotrophy markers. Served as vector control                                                                                                                             |
| pRrm4-Gfp-pACTII-Ade      | 427  | <i>rrm4</i> | Plasmid for expressing an Rrm4 hybrid protein, fused N-terminally to a Gal4 activation domain and C-terminally to eGfp. The plasmid is derived from pACTII-Ade (König et al., 2007).                                                                                                                                                                                                |
| pIII MS2-5                | 494  |             | Plasmid for expressing RNA-hybrids. Contains a <i>RPR1</i> leader, followed by two MS2 coat protein binding sites, a junk sequence flanked by a ClaI & AscI restriction sites, and a <i>RPR1</i> terminator. For positive selection this plasmid carries the <i>URA3</i> auxotrophy marker. Sequences can be cloned via the ClaI/ AscI restriction sites. Served as vector control. |
| pRrm4-mR3-Gfp-pACTII-Ade  | 526  | <i>rrm4</i> | Plasmid for expressing the Rrm4 <sup>mR3</sup> hybrid protein. Similar to pRrm4-gfp-pACTII-Ade, but carries a mutation in the RNP1 region of RRM3 (König et al., 2007)                                                                                                                                                                                                              |
| pIII-MS2-5-Sel13          | 550  |             | Plasmid for expressing the RNA-hybrid containing the SELEX aptamer A1. SELEX library sequences were inserted into pIII MS2-4 via ClaI/AscI (König et al., 2007).                                                                                                                                                                                                                    |
| pRrm4-mR1-Gfp-pACTII-Ade  | 581  | <i>rrm4</i> | Plasmid for expressing the Rrm4 <sup>mR1</sup> hybrid protein. Similar to pRrm4-gfp-pACTII-Ade, but carries a mutation in the RNP1 region of RRM1 (König et al., 2007).                                                                                                                                                                                                             |
| pRrm4-mR12-Gfp-pACTII-Ade | 591  | <i>rrm4</i> | Plasmid for expressing the Rrm4 <sup>mR12</sup> hybrid protein. Similar to pRrm4-gfp-pACTII-Ade, but carries mutations in the RNP1 regions of RRM1 and RRM2.                                                                                                                                                                                                                        |
| pRrm4-mR2-Gfp-pACTII-Ade  | 594  | <i>rrm4</i> | Plasmid for expressing the Rrm4 <sup>mR2</sup> hybrid protein. Similar to pRrm4-gfp-pACTII-Ade, but carries a mutation in the RNP1 region of RRM2 (König et al., 2007)                                                                                                                                                                                                              |
| pIII MS2-5 A1- mUAUG      | 1937 |             | Plasmid for expressing the RNA-hybrid containing SELEX aptamer A1 <sup>mUAUG</sup> . TATGC was mutated to TCTCA by inverse PCR using oligos oRL750<br>GTGTGAAAGATCCGAAGTTTCTCACGGCAGCGCTGGCGCTG<br>& oRL751<br>CAGCGCCAGCGGTGCCGTGAGAACTTCGGATCTTTCACAC<br>and pIII-MS2-5-Sel13 as template.                                                                                        |
